# Supplementary material
Source: publisher site journal article supplement (https://www.spandidos-publications.com/3985/downloadSupplementary)
Supplement: Supplementary file 1 [file downloadSupplementary]

## Sheet: Patient no.1-16
Table SI. Expression raw data of DLEU1 in patients with CC and controls. DLEU1, long noncoding RNA deleted in lymphocytic leukemia 1; CC, cervical cancer.
Experiment Information
Name	DLEU1_patient no.1-16
Operator	admin
Location	F:\keyan\7900HT\experiments\admin
Template	F:\keyan\7900HT\templates\SYBR Green 两步法.tmt
Tips
Data
Well	Subset ID	Reporter	S_Name	S_Type	Ct	Quantity	Gene
A1	S I	SYBR GREEN	P1	Unknown Sample	21.6607	-	DLEU1
A2	S I	SYBR GREEN	P2	Unknown Sample	21.3759	-	DLEU1
A3	S I	SYBR GREEN	P3	Unknown Sample	27.4234	-	DLEU1
A4	S I	SYBR GREEN	P4	Unknown Sample	25.1285	-	DLEU1
A5	S I	SYBR GREEN	P5	Unknown Sample	24.3593	-	DLEU1
A6	S I	SYBR GREEN	P6	Unknown Sample	25.4917	-	DLEU1
A7	S I	SYBR GREEN	P7	Unknown Sample	24.1294	-	DLEU1
A8	S I	SYBR GREEN	P8	Unknown Sample	24.1322	-	DLEU1
A9	S I	SYBR GREEN	P9	Unknown Sample	25.0269	-	DLEU1
A10	S I	SYBR GREEN	P10	Unknown Sample	20.5681	-	DLEU1
A11	S I	SYBR GREEN	P11	Unknown Sample	21.7989	-	DLEU1
A12	S I	SYBR GREEN	P12	Unknown Sample	20.8732	-	DLEU1
B1	S I	SYBR GREEN	P13	Unknown Sample	25.8043	-	DLEU1
B2	S I	SYBR GREEN	P14	Unknown Sample	22.9197	-	DLEU1
B3	S I	SYBR GREEN	P15	Unknown Sample	22.3476	-	DLEU1
B4	S I	SYBR GREEN	P16	Unknown Sample	25.7122	-	DLEU1
B5	S I	SYBR GREEN	P17	Unknown Sample	21.6155	-	DLEU1
B6	S I	SYBR GREEN	P18	Unknown Sample	20.5373	-	DLEU1
B7	S I	SYBR GREEN	P19	Unknown Sample	23.8748	-	DLEU1
B8	S I	SYBR GREEN	P20	Unknown Sample	20.8597	-	DLEU1
B9	S I	SYBR GREEN	P21	Unknown Sample	21.9963	-	DLEU1
B10	S I	SYBR GREEN	P22	Unknown Sample	21.917	-	DLEU1
B11	S I	SYBR GREEN	P23	Unknown Sample	27.0439	-	DLEU1
B12	S I	SYBR GREEN	P24	Unknown Sample	23.7804	-	DLEU1
C1	S I	SYBR GREEN	P25	Unknown Sample	22.1076	-	DLEU1
C2	S I	SYBR GREEN	P26	Unknown Sample	21.3502	-	DLEU1
C3	S I	SYBR GREEN	P27	Unknown Sample	24.8387	-	DLEU1
C4	S I	SYBR GREEN	P28	Unknown Sample	25.9666	-	DLEU1
C5	S I	SYBR GREEN	P29	Unknown Sample	25.6692	-	DLEU1
C6	S I	SYBR GREEN	P30	Unknown Sample	26.4522	-	DLEU1
C7	S I	SYBR GREEN	P31	Unknown Sample	22.0101	-	DLEU1
C8	S I	SYBR GREEN	P32	Unknown Sample	20.4254	-	DLEU1
C9	S I	SYBR GREEN	P33	Unknown Sample	23.007	-	DLEU1
C10	S I	SYBR GREEN	P34	Unknown Sample	21.6209	-	DLEU1
C11	S I	SYBR GREEN	P35	Unknown Sample	23.7381	-	DLEU1
C12	S I	SYBR GREEN	P36	Unknown Sample	24.8979	-	DLEU1
D1	S I	SYBR GREEN	P37	Unknown Sample	26.8914	-	DLEU1
D2	S I	SYBR GREEN	P38	Unknown Sample	24.51	-	DLEU1
D3	S I	SYBR GREEN	P39	Unknown Sample	25.6531	-	DLEU1
D4	S I	SYBR GREEN	P40	Unknown Sample	24.0888	-	DLEU1
D5	S I	SYBR GREEN	P41	Unknown Sample	23.5881	-	DLEU1
D6	S I	SYBR GREEN	P42	Unknown Sample	25.6925	-	DLEU1
D7	S I	SYBR GREEN	P43	Unknown Sample	22.0731	-	DLEU1
D8	S I	SYBR GREEN	P44	Unknown Sample	22.7688	-	DLEU1
D9	S I	SYBR GREEN	P45	Unknown Sample	24.2486	-	DLEU1
D10	S I	SYBR GREEN	P46	Unknown Sample	22.1892	-	DLEU1
D11	S I	SYBR GREEN	P47	Unknown Sample	21.2079	-	DLEU1
D12	S I	SYBR GREEN	P48	Unknown Sample	20.9315	-	DLEU1
E1	S I	SYBR GREEN	P49	Unknown Sample	19.9667	-	GAPDH
E2	S I	SYBR GREEN	P50	Unknown Sample	21.3796	-	GAPDH
E3	S I	SYBR GREEN	P51	Unknown Sample	22.7253	-	GAPDH
E4	S I	SYBR GREEN	P52	Unknown Sample	23.2725	-	GAPDH
E5	S I	SYBR GREEN	P53	Unknown Sample	20.3586	-	GAPDH
E6	S I	SYBR GREEN	P54	Unknown Sample	19.0458	-	GAPDH
E7	S I	SYBR GREEN	P55	Unknown Sample	20.5375	-	GAPDH
E8	S I	SYBR GREEN	P56	Unknown Sample	18.0459	-	GAPDH
E9	S I	SYBR GREEN	P57	Unknown Sample	19.8343	-	GAPDH
E10	S I	SYBR GREEN	P58	Unknown Sample	23.0577	-	GAPDH
E11	S I	SYBR GREEN	P59	Unknown Sample	23.6622	-	GAPDH
E12	S I	SYBR GREEN	P60	Unknown Sample	23.3068	-	GAPDH
F1	S I	SYBR GREEN	P61	Unknown Sample	22.667	-	GAPDH
F2	S I	SYBR GREEN	P62	Unknown Sample	19.1811	-	GAPDH
F3	S I	SYBR GREEN	P63	Unknown Sample	22.1736	-	GAPDH
F4	S I	SYBR GREEN	P64	Unknown Sample	22.8952	-	GAPDH
F5	S I	SYBR GREEN	P65	Unknown Sample	23.7416	-	GAPDH
F6	S I	SYBR GREEN	P66	Unknown Sample	23.0501	-	GAPDH
F7	S I	SYBR GREEN	P67	Unknown Sample	19.4011	-	GAPDH
F8	S I	SYBR GREEN	P68	Unknown Sample	24.7013	-	GAPDH
F9	S I	SYBR GREEN	P69	Unknown Sample	24.4736	-	GAPDH
F10	S I	SYBR GREEN	P70	Unknown Sample	18.7146	-	GAPDH
F11	S I	SYBR GREEN	P71	Unknown Sample	19.9088	-	GAPDH
F12	S I	SYBR GREEN	P72	Unknown Sample	20.506	-	GAPDH
G1	S I	SYBR GREEN	P73	Unknown Sample	18.7661	-	GAPDH
G2	S I	SYBR GREEN	P74	Unknown Sample	21.5845	-	GAPDH
G3	S I	SYBR GREEN	P75	Unknown Sample	21.2179	-	GAPDH
G4	S I	SYBR GREEN	P76	Unknown Sample	18.3724	-	GAPDH
G5	S I	SYBR GREEN	P77	Unknown Sample	23.1302	-	GAPDH
G6	S I	SYBR GREEN	P78	Unknown Sample	18.9975	-	GAPDH
G7	S I	SYBR GREEN	P79	Unknown Sample	21.1179	-	GAPDH
G8	S I	SYBR GREEN	P80	Unknown Sample	24.5162	-	GAPDH
G9	S I	SYBR GREEN	P81	Unknown Sample	21.4882	-	GAPDH
G10	S I	SYBR GREEN	P82	Unknown Sample	22.0269	-	GAPDH
G11	S I	SYBR GREEN	P83	Unknown Sample	19.6485	-	GAPDH
G12	S I	SYBR GREEN	P84	Unknown Sample	19.3112	-	GAPDH
H1	S I	SYBR GREEN	P85	Unknown Sample	22.6573	-	GAPDH
H2	S I	SYBR GREEN	P86	Unknown Sample	23.5191	-	GAPDH
H3	S I	SYBR GREEN	P87	Unknown Sample	18.4684	-	GAPDH
H4	S I	SYBR GREEN	P88	Unknown Sample	19.6376	-	GAPDH
H5	S I	SYBR GREEN	P89	Unknown Sample	20.0201	-	GAPDH
H6	S I	SYBR GREEN	P90	Unknown Sample	23.7633	-	GAPDH
H7	S I	SYBR GREEN	P91	Unknown Sample	24.1457	-	GAPDH
H8	S I	SYBR GREEN	P92	Unknown Sample	20.0437	-	GAPDH
H9	S I	SYBR GREEN	P93	Unknown Sample	23.4412	-	GAPDH
H10	S I	SYBR GREEN	P94	Unknown Sample	23.4979	-	GAPDH
H11	S I	SYBR GREEN	P95	Unknown Sample	24.9082	-	GAPDH
H12	S I	SYBR GREEN	P96	Unknown Sample	19.5347	-	GAPDH

## Sheet: Patient no.17-32
Experiment Information
Name	DLEU1_patient no.17-32
Operator	admin
Location	F:\keyan\7900HT\experiments\admin
Template	F:\keyan\7900HT\templates\SYBR Green 两步法.tmt
Tips
Data
Well	Subset ID	Reporter	S_Name	S_Type	Ct	Quantity	Gene
A1	S I	SYBR GREEN	P1	Unknown Sample	24.6097	-	DLEU1
A2	S I	SYBR GREEN	P2	Unknown Sample	24.8769	-	DLEU1
A3	S I	SYBR GREEN	P3	Unknown Sample	27.2647	-	DLEU1
A4	S I	SYBR GREEN	P4	Unknown Sample	20.5935	-	DLEU1
A5	S I	SYBR GREEN	P5	Unknown Sample	26.5099	-	DLEU1
A6	S I	SYBR GREEN	P6	Unknown Sample	22.0885	-	DLEU1
A7	S I	SYBR GREEN	P7	Unknown Sample	21.0701	-	DLEU1
A8	S I	SYBR GREEN	P8	Unknown Sample	23.1989	-	DLEU1
A9	S I	SYBR GREEN	P9	Unknown Sample	21.0134	-	DLEU1
A10	S I	SYBR GREEN	P10	Unknown Sample	23.1838	-	DLEU1
A11	S I	SYBR GREEN	P11	Unknown Sample	27.4523	-	DLEU1
A12	S I	SYBR GREEN	P12	Unknown Sample	23.0449	-	DLEU1
B1	S I	SYBR GREEN	P13	Unknown Sample	22.6743	-	DLEU1
B2	S I	SYBR GREEN	P14	Unknown Sample	25.4182	-	DLEU1
B3	S I	SYBR GREEN	P15	Unknown Sample	22.9637	-	DLEU1
B4	S I	SYBR GREEN	P16	Unknown Sample	29.2478	-	DLEU1
B5	S I	SYBR GREEN	P17	Unknown Sample	23.4084	-	DLEU1
B6	S I	SYBR GREEN	P18	Unknown Sample	26.5064	-	DLEU1
B7	S I	SYBR GREEN	P19	Unknown Sample	26.7662	-	DLEU1
B8	S I	SYBR GREEN	P20	Unknown Sample	22.1019	-	DLEU1
B9	S I	SYBR GREEN	P21	Unknown Sample	23.1436	-	DLEU1
B10	S I	SYBR GREEN	P22	Unknown Sample	22.3491	-	DLEU1
B11	S I	SYBR GREEN	P23	Unknown Sample	25.511	-	DLEU1
B12	S I	SYBR GREEN	P24	Unknown Sample	24.9371	-	DLEU1
C1	S I	SYBR GREEN	P25	Unknown Sample	29.1493	-	DLEU1
C2	S I	SYBR GREEN	P26	Unknown Sample	29.9659	-	DLEU1
C3	S I	SYBR GREEN	P27	Unknown Sample	23.7572	-	DLEU1
C4	S I	SYBR GREEN	P28	Unknown Sample	26.6097	-	DLEU1
C5	S I	SYBR GREEN	P29	Unknown Sample	23.0601	-	DLEU1
C6	S I	SYBR GREEN	P30	Unknown Sample	22.5448	-	DLEU1
C7	S I	SYBR GREEN	P31	Unknown Sample	25.8735	-	DLEU1
C8	S I	SYBR GREEN	P32	Unknown Sample	24.016	-	DLEU1
C9	S I	SYBR GREEN	P33	Unknown Sample	28.5084	-	DLEU1
C10	S I	SYBR GREEN	P34	Unknown Sample	25.3558	-	DLEU1
C11	S I	SYBR GREEN	P35	Unknown Sample	19.8063	-	DLEU1
C12	S I	SYBR GREEN	P36	Unknown Sample	25.0741	-	DLEU1
D1	S I	SYBR GREEN	P37	Unknown Sample	20.9796	-	DLEU1
D2	S I	SYBR GREEN	P38	Unknown Sample	23.9593	-	DLEU1
D3	S I	SYBR GREEN	P39	Unknown Sample	26.2746	-	DLEU1
D4	S I	SYBR GREEN	P40	Unknown Sample	21.8976	-	DLEU1
D5	S I	SYBR GREEN	P41	Unknown Sample	26.5199	-	DLEU1
D6	S I	SYBR GREEN	P42	Unknown Sample	27.591	-	DLEU1
D7	S I	SYBR GREEN	P43	Unknown Sample	21.7069	-	DLEU1
D8	S I	SYBR GREEN	P44	Unknown Sample	20.2618	-	DLEU1
D9	S I	SYBR GREEN	P45	Unknown Sample	22.2757	-	DLEU1
D10	S I	SYBR GREEN	P46	Unknown Sample	25.8176	-	DLEU1
D11	S I	SYBR GREEN	P47	Unknown Sample	21.4692	-	DLEU1
D12	S I	SYBR GREEN	P48	Unknown Sample	21.3402	-	DLEU1
E1	S I	SYBR GREEN	P49	Unknown Sample	23.0348	-	GAPDH
E2	S I	SYBR GREEN	P50	Unknown Sample	18.6634	-	GAPDH
E3	S I	SYBR GREEN	P51	Unknown Sample	22.0602	-	GAPDH
E4	S I	SYBR GREEN	P52	Unknown Sample	18.1964	-	GAPDH
E5	S I	SYBR GREEN	P53	Unknown Sample	20.9613	-	GAPDH
E6	S I	SYBR GREEN	P54	Unknown Sample	20.4303	-	GAPDH
E7	S I	SYBR GREEN	P55	Unknown Sample	18.4184	-	GAPDH
E8	S I	SYBR GREEN	P56	Unknown Sample	24.3363	-	GAPDH
E9	S I	SYBR GREEN	P57	Unknown Sample	21.1779	-	GAPDH
E10	S I	SYBR GREEN	P58	Unknown Sample	18.9573	-	GAPDH
E11	S I	SYBR GREEN	P59	Unknown Sample	18.5555	-	GAPDH
E12	S I	SYBR GREEN	P60	Unknown Sample	24.2142	-	GAPDH
F1	S I	SYBR GREEN	P61	Unknown Sample	20.9137	-	GAPDH
F2	S I	SYBR GREEN	P62	Unknown Sample	24.5831	-	GAPDH
F3	S I	SYBR GREEN	P63	Unknown Sample	22.2867	-	GAPDH
F4	S I	SYBR GREEN	P64	Unknown Sample	20.2188	-	GAPDH
F5	S I	SYBR GREEN	P65	Unknown Sample	24.0319	-	GAPDH
F6	S I	SYBR GREEN	P66	Unknown Sample	20.2989	-	GAPDH
F7	S I	SYBR GREEN	P67	Unknown Sample	19.6171	-	GAPDH
F8	S I	SYBR GREEN	P68	Unknown Sample	23.5214	-	GAPDH
F9	S I	SYBR GREEN	P69	Unknown Sample	23.7728	-	GAPDH
F10	S I	SYBR GREEN	P70	Unknown Sample	18.3467	-	GAPDH
F11	S I	SYBR GREEN	P71	Unknown Sample	21.4023	-	GAPDH
F12	S I	SYBR GREEN	P72	Unknown Sample	22.1209	-	GAPDH
G1	S I	SYBR GREEN	P73	Unknown Sample	21.2618	-	GAPDH
G2	S I	SYBR GREEN	P74	Unknown Sample	19.6136	-	GAPDH
G3	S I	SYBR GREEN	P75	Unknown Sample	22.3381	-	GAPDH
G4	S I	SYBR GREEN	P76	Unknown Sample	24.819	-	GAPDH
G5	S I	SYBR GREEN	P77	Unknown Sample	18.7434	-	GAPDH
G6	S I	SYBR GREEN	P78	Unknown Sample	23.9915	-	GAPDH
G7	S I	SYBR GREEN	P79	Unknown Sample	19.9552	-	GAPDH
G8	S I	SYBR GREEN	P80	Unknown Sample	19.0418	-	GAPDH
G9	S I	SYBR GREEN	P81	Unknown Sample	19.73	-	GAPDH
G10	S I	SYBR GREEN	P82	Unknown Sample	20.9872	-	GAPDH
G11	S I	SYBR GREEN	P83	Unknown Sample	20.4489	-	GAPDH
G12	S I	SYBR GREEN	P84	Unknown Sample	23.151	-	GAPDH
H1	S I	SYBR GREEN	P85	Unknown Sample	23.1298	-	GAPDH
H2	S I	SYBR GREEN	P86	Unknown Sample	22.8863	-	GAPDH
H3	S I	SYBR GREEN	P87	Unknown Sample	19.9354	-	GAPDH
H4	S I	SYBR GREEN	P88	Unknown Sample	20.3329	-	GAPDH
H5	S I	SYBR GREEN	P89	Unknown Sample	21.9382	-	GAPDH
H6	S I	SYBR GREEN	P90	Unknown Sample	18.447	-	GAPDH
H7	S I	SYBR GREEN	P91	Unknown Sample	22.9634	-	GAPDH
H8	S I	SYBR GREEN	P92	Unknown Sample	22.6024	-	GAPDH
H9	S I	SYBR GREEN	P93	Unknown Sample	24.9417	-	GAPDH
H10	S I	SYBR GREEN	P94	Unknown Sample	20.1851	-	GAPDH
H11	S I	SYBR GREEN	P95	Unknown Sample	24.0831	-	GAPDH
H12	S I	SYBR GREEN	P96	Unknown Sample	22.1995	-	GAPDH
					Ct
					21.6607
					21.3759
					27.4234
					25.1285
					24.3593
					25.4917
					24.1294
					24.1322
					25.0269
					20.5681
					21.7989
					20.8732
					25.8043
					22.9197
					22.3476
					25.7122
					21.6155
					20.5373
					23.8748
					20.8597
					21.9963
					21.917
					27.0439
					23.7804
					22.1076
					21.3502
					24.8387
					25.9666
					25.6692
					26.4522
					22.0101
					20.4254
					23.007
					21.6209
					23.7381
					24.8979
					26.8914
					24.51
					25.6531
					24.0888
					23.5881
					25.6925
					22.0731
					22.7688
					24.2486
					22.1892
					21.2079
					20.9315
					19.9667
					21.3796
					22.7253
					23.2725
					20.3586
					19.0458
					20.5375
					18.0459
					19.8343
					23.0577
					23.6622
					23.3068
					22.667
					19.1811
					22.1736
					22.8952
					23.7416
					23.0501
					19.4011
					24.7013
					24.4736
					18.7146
					19.9088
					20.506
					18.7661
					21.5845
					21.2179
					18.3724
					23.1302
					18.9975
					21.1179
					24.5162
					21.4882
					22.0269
					19.6485
					19.3112
					22.6573
					23.5191
					18.4684
					19.6376
					20.0201
					23.7633
					24.1457
					20.0437
					23.4412
					23.4979
					24.9082
					19.5347

## Sheet: Patient no.33-48
Experiment Information
Name	DLEU1_patient no.33-48
Operator	admin
Location	F:\keyan\7900HT\experiments\admin
Template	F:\keyan\7900HT\templates\SYBR Green 两步法.tmt
Tips
Data
Well	Subset ID	Reporter	S_Name	S_Type	Ct	Quantity	Gene
A1	S I	SYBR GREEN	P1	Unknown Sample	23.3246	-	DLEU1
A2	S I	SYBR GREEN	P2	Unknown Sample	23.3223	-	DLEU1
A3	S I	SYBR GREEN	P3	Unknown Sample	25.3729	-	DLEU1
A4	S I	SYBR GREEN	P4	Unknown Sample	20.5955	-	DLEU1
A5	S I	SYBR GREEN	P5	Unknown Sample	22.6385	-	DLEU1
A6	S I	SYBR GREEN	P6	Unknown Sample	25.258	-	DLEU1
A7	S I	SYBR GREEN	P7	Unknown Sample	23.6598	-	DLEU1
A8	S I	SYBR GREEN	P8	Unknown Sample	28.9148	-	DLEU1
A9	S I	SYBR GREEN	P9	Unknown Sample	24.3559	-	DLEU1
A10	S I	SYBR GREEN	P10	Unknown Sample	19.7338	-	DLEU1
A11	S I	SYBR GREEN	P11	Unknown Sample	25.1148	-	DLEU1
A12	S I	SYBR GREEN	P12	Unknown Sample	23.5586	-	DLEU1
B1	S I	SYBR GREEN	P13	Unknown Sample	25.9238	-	DLEU1
B2	S I	SYBR GREEN	P14	Unknown Sample	23.529	-	DLEU1
B3	S I	SYBR GREEN	P15	Unknown Sample	22.9529	-	DLEU1
B4	S I	SYBR GREEN	P16	Unknown Sample	27.9484	-	DLEU1
B5	S I	SYBR GREEN	P17	Unknown Sample	26.5413	-	DLEU1
B6	S I	SYBR GREEN	P18	Unknown Sample	27.8223	-	DLEU1
B7	S I	SYBR GREEN	P19	Unknown Sample	22.108	-	DLEU1
B8	S I	SYBR GREEN	P20	Unknown Sample	27.6422	-	DLEU1
B9	S I	SYBR GREEN	P21	Unknown Sample	22.1636	-	DLEU1
B10	S I	SYBR GREEN	P22	Unknown Sample	23.7192	-	DLEU1
B11	S I	SYBR GREEN	P23	Unknown Sample	21.9844	-	DLEU1
B12	S I	SYBR GREEN	P24	Unknown Sample	21.571	-	DLEU1
C1	S I	SYBR GREEN	P25	Unknown Sample	22.4097	-	DLEU1
C2	S I	SYBR GREEN	P26	Unknown Sample	27.3577	-	DLEU1
C3	S I	SYBR GREEN	P27	Unknown Sample	22.0936	-	DLEU1
C4	S I	SYBR GREEN	P28	Unknown Sample	22.9726	-	DLEU1
C5	S I	SYBR GREEN	P29	Unknown Sample	22.3435	-	DLEU1
C6	S I	SYBR GREEN	P30	Unknown Sample	27.8007	-	DLEU1
C7	S I	SYBR GREEN	P31	Unknown Sample	22.7106	-	DLEU1
C8	S I	SYBR GREEN	P32	Unknown Sample	21.304	-	DLEU1
C9	S I	SYBR GREEN	P33	Unknown Sample	20.6281	-	DLEU1
C10	S I	SYBR GREEN	P34	Unknown Sample	26.8573	-	DLEU1
C11	S I	SYBR GREEN	P35	Unknown Sample	27.8822	-	DLEU1
C12	S I	SYBR GREEN	P36	Unknown Sample	22.0755	-	DLEU1
D1	S I	SYBR GREEN	P37	Unknown Sample	23.1285	-	DLEU1
D2	S I	SYBR GREEN	P38	Unknown Sample	23.4169	-	DLEU1
D3	S I	SYBR GREEN	P39	Unknown Sample	28.2645	-	DLEU1
D4	S I	SYBR GREEN	P40	Unknown Sample	23.7936	-	DLEU1
D5	S I	SYBR GREEN	P41	Unknown Sample	22.4651	-	DLEU1
D6	S I	SYBR GREEN	P42	Unknown Sample	24.6596	-	DLEU1
D7	S I	SYBR GREEN	P43	Unknown Sample	20.6679	-	DLEU1
D8	S I	SYBR GREEN	P44	Unknown Sample	20.609	-	DLEU1
D9	S I	SYBR GREEN	P45	Unknown Sample	21.0238	-	DLEU1
D10	S I	SYBR GREEN	P46	Unknown Sample	21.4506	-	DLEU1
D11	S I	SYBR GREEN	P47	Unknown Sample	26.3888	-	DLEU1
D12	S I	SYBR GREEN	P48	Unknown Sample	22.4591	-	DLEU1
E1	S I	SYBR GREEN	P49	Unknown Sample	20.4558	-	GAPDH
E2	S I	SYBR GREEN	P50	Unknown Sample	20.3008	-	GAPDH
E3	S I	SYBR GREEN	P51	Unknown Sample	23.961	-	GAPDH
E4	S I	SYBR GREEN	P52	Unknown Sample	22.4723	-	GAPDH
E5	S I	SYBR GREEN	P53	Unknown Sample	19.8261	-	GAPDH
E6	S I	SYBR GREEN	P54	Unknown Sample	21.0183	-	GAPDH
E7	S I	SYBR GREEN	P55	Unknown Sample	23.7609	-	GAPDH
E8	S I	SYBR GREEN	P56	Unknown Sample	21.8205	-	GAPDH
E9	S I	SYBR GREEN	P57	Unknown Sample	20.2241	-	GAPDH
E10	S I	SYBR GREEN	P58	Unknown Sample	22.1579	-	GAPDH
E11	S I	SYBR GREEN	P59	Unknown Sample	24.5793	-	GAPDH
E12	S I	SYBR GREEN	P60	Unknown Sample	23.6628	-	GAPDH
F1	S I	SYBR GREEN	P61	Unknown Sample	23.8545	-	GAPDH
F2	S I	SYBR GREEN	P62	Unknown Sample	20.0853	-	GAPDH
F3	S I	SYBR GREEN	P63	Unknown Sample	22.6084	-	GAPDH
F4	S I	SYBR GREEN	P64	Unknown Sample	24.8457	-	GAPDH
F5	S I	SYBR GREEN	P65	Unknown Sample	24.1995	-	GAPDH
F6	S I	SYBR GREEN	P66	Unknown Sample	19.2174	-	GAPDH
F7	S I	SYBR GREEN	P67	Unknown Sample	18.2519	-	GAPDH
F8	S I	SYBR GREEN	P68	Unknown Sample	24.7883	-	GAPDH
F9	S I	SYBR GREEN	P69	Unknown Sample	19.3734	-	GAPDH
F10	S I	SYBR GREEN	P70	Unknown Sample	23.3531	-	GAPDH
F11	S I	SYBR GREEN	P71	Unknown Sample	19.6355	-	GAPDH
F12	S I	SYBR GREEN	P72	Unknown Sample	21.8547	-	GAPDH
G1	S I	SYBR GREEN	P73	Unknown Sample	20.4766	-	GAPDH
G2	S I	SYBR GREEN	P74	Unknown Sample	21.4324	-	GAPDH
G3	S I	SYBR GREEN	P75	Unknown Sample	18.8538	-	GAPDH
G4	S I	SYBR GREEN	P76	Unknown Sample	21.7773	-	GAPDH
G5	S I	SYBR GREEN	P77	Unknown Sample	23.6835	-	GAPDH
G6	S I	SYBR GREEN	P78	Unknown Sample	20.749	-	GAPDH
G7	S I	SYBR GREEN	P79	Unknown Sample	18.4489	-	GAPDH
G8	S I	SYBR GREEN	P80	Unknown Sample	20.7162	-	GAPDH
G9	S I	SYBR GREEN	P81	Unknown Sample	20.486	-	GAPDH
G10	S I	SYBR GREEN	P82	Unknown Sample	19.3389	-	GAPDH
G11	S I	SYBR GREEN	P83	Unknown Sample	19.9595	-	GAPDH
G12	S I	SYBR GREEN	P84	Unknown Sample	24.3972	-	GAPDH
H1	S I	SYBR GREEN	P85	Unknown Sample	18.622	-	GAPDH
H2	S I	SYBR GREEN	P86	Unknown Sample	24.4472	-	GAPDH
H3	S I	SYBR GREEN	P87	Unknown Sample	23.645	-	GAPDH
H4	S I	SYBR GREEN	P88	Unknown Sample	18.2645	-	GAPDH
H5	S I	SYBR GREEN	P89	Unknown Sample	23.2252	-	GAPDH
H6	S I	SYBR GREEN	P90	Unknown Sample	23.9585	-	GAPDH
H7	S I	SYBR GREEN	P91	Unknown Sample	21.988	-	GAPDH
H8	S I	SYBR GREEN	P92	Unknown Sample	22.9599	-	GAPDH
H9	S I	SYBR GREEN	P93	Unknown Sample	19.3553	-	GAPDH
H10	S I	SYBR GREEN	P94	Unknown Sample	24.6743	-	GAPDH
H11	S I	SYBR GREEN	P95	Unknown Sample	18.8153	-	GAPDH
H12	S I	SYBR GREEN	P96	Unknown Sample	20.529	-	GAPDH

## Sheet: Patient no.49-64
Experiment Information
Name	DLEU1_patient no.49-64
Operator	admin
Location	F:\keyan\7900HT\experiments\admin
Template	F:\keyan\7900HT\templates\SYBR Green 两步法.tmt
Tips
Data
Well	Subset ID	Reporter	S_Name	S_Type	Ct	Quantity	Gene
A1	S I	SYBR GREEN	P1	Unknown Sample	27.0763	-	DLEU1
A2	S I	SYBR GREEN	P2	Unknown Sample	20.5109	-	DLEU1
A3	S I	SYBR GREEN	P3	Unknown Sample	22.1762	-	DLEU1
A4	S I	SYBR GREEN	P4	Unknown Sample	24.57	-	DLEU1
A5	S I	SYBR GREEN	P5	Unknown Sample	24.0951	-	DLEU1
A6	S I	SYBR GREEN	P6	Unknown Sample	24.046	-	DLEU1
A7	S I	SYBR GREEN	P7	Unknown Sample	24.8708	-	DLEU1
A8	S I	SYBR GREEN	P8	Unknown Sample	24.7465	-	DLEU1
A9	S I	SYBR GREEN	P9	Unknown Sample	25.5192	-	DLEU1
A10	S I	SYBR GREEN	P10	Unknown Sample	22.1445	-	DLEU1
A11	S I	SYBR GREEN	P11	Unknown Sample	22.2087	-	DLEU1
A12	S I	SYBR GREEN	P12	Unknown Sample	26.3484	-	DLEU1
B1	S I	SYBR GREEN	P13	Unknown Sample	19.3076	-	DLEU1
B2	S I	SYBR GREEN	P14	Unknown Sample	21.5587	-	DLEU1
B3	S I	SYBR GREEN	P15	Unknown Sample	19.318	-	DLEU1
B4	S I	SYBR GREEN	P16	Unknown Sample	27.184	-	DLEU1
B5	S I	SYBR GREEN	P17	Unknown Sample	24.1783	-	DLEU1
B6	S I	SYBR GREEN	P18	Unknown Sample	23.6486	-	DLEU1
B7	S I	SYBR GREEN	P19	Unknown Sample	23.0579	-	DLEU1
B8	S I	SYBR GREEN	P20	Unknown Sample	22.9451	-	DLEU1
B9	S I	SYBR GREEN	P21	Unknown Sample	28.7881	-	DLEU1
B10	S I	SYBR GREEN	P22	Unknown Sample	26.7781	-	DLEU1
B11	S I	SYBR GREEN	P23	Unknown Sample	21.3296	-	DLEU1
B12	S I	SYBR GREEN	P24	Unknown Sample	27.19	-	DLEU1
C1	S I	SYBR GREEN	P25	Unknown Sample	21.2559	-	DLEU1
C2	S I	SYBR GREEN	P26	Unknown Sample	21.9489	-	DLEU1
C3	S I	SYBR GREEN	P27	Unknown Sample	21.2826	-	DLEU1
C4	S I	SYBR GREEN	P28	Unknown Sample	19.5468	-	DLEU1
C5	S I	SYBR GREEN	P29	Unknown Sample	26.3705	-	DLEU1
C6	S I	SYBR GREEN	P30	Unknown Sample	25.5998	-	DLEU1
C7	S I	SYBR GREEN	P31	Unknown Sample	20.1186	-	DLEU1
C8	S I	SYBR GREEN	P32	Unknown Sample	22.3781	-	DLEU1
C9	S I	SYBR GREEN	P33	Unknown Sample	23.9353	-	DLEU1
C10	S I	SYBR GREEN	P34	Unknown Sample	23.0191	-	DLEU1
C11	S I	SYBR GREEN	P35	Unknown Sample	23.5285	-	DLEU1
C12	S I	SYBR GREEN	P36	Unknown Sample	23.2176	-	DLEU1
D1	S I	SYBR GREEN	P37	Unknown Sample	28.1757	-	DLEU1
D2	S I	SYBR GREEN	P38	Unknown Sample	21.9581	-	DLEU1
D3	S I	SYBR GREEN	P39	Unknown Sample	26.2261	-	DLEU1
D4	S I	SYBR GREEN	P40	Unknown Sample	22.8938	-	DLEU1
D5	S I	SYBR GREEN	P41	Unknown Sample	21.3397	-	DLEU1
D6	S I	SYBR GREEN	P42	Unknown Sample	22.1642	-	DLEU1
D7	S I	SYBR GREEN	P43	Unknown Sample	22.2667	-	DLEU1
D8	S I	SYBR GREEN	P44	Unknown Sample	24.7417	-	DLEU1
D9	S I	SYBR GREEN	P45	Unknown Sample	22.9441	-	DLEU1
D10	S I	SYBR GREEN	P46	Unknown Sample	25.9523	-	DLEU1
D11	S I	SYBR GREEN	P47	Unknown Sample	26.0789	-	DLEU1
D12	S I	SYBR GREEN	P48	Unknown Sample	22.6481	-	DLEU1
E1	S I	SYBR GREEN	P49	Unknown Sample	22.2338	-	GAPDH
E2	S I	SYBR GREEN	P50	Unknown Sample	21.2818	-	GAPDH
E3	S I	SYBR GREEN	P51	Unknown Sample	20.7125	-	GAPDH
E4	S I	SYBR GREEN	P52	Unknown Sample	20.5406	-	GAPDH
E5	S I	SYBR GREEN	P53	Unknown Sample	19.9597	-	GAPDH
E6	S I	SYBR GREEN	P54	Unknown Sample	22.2951	-	GAPDH
E7	S I	SYBR GREEN	P55	Unknown Sample	20.3296	-	GAPDH
E8	S I	SYBR GREEN	P56	Unknown Sample	23.6039	-	GAPDH
E9	S I	SYBR GREEN	P57	Unknown Sample	23.2876	-	GAPDH
E10	S I	SYBR GREEN	P58	Unknown Sample	24.2262	-	GAPDH
E11	S I	SYBR GREEN	P59	Unknown Sample	20.276	-	GAPDH
E12	S I	SYBR GREEN	P60	Unknown Sample	21.6783	-	GAPDH
F1	S I	SYBR GREEN	P61	Unknown Sample	24.5845	-	GAPDH
F2	S I	SYBR GREEN	P62	Unknown Sample	22.2476	-	GAPDH
F3	S I	SYBR GREEN	P63	Unknown Sample	24.1737	-	GAPDH
F4	S I	SYBR GREEN	P64	Unknown Sample	19.529	-	GAPDH
F5	S I	SYBR GREEN	P65	Unknown Sample	18.1581	-	GAPDH
F6	S I	SYBR GREEN	P66	Unknown Sample	21.3412	-	GAPDH
F7	S I	SYBR GREEN	P67	Unknown Sample	24.6431	-	GAPDH
F8	S I	SYBR GREEN	P68	Unknown Sample	24.3358	-	GAPDH
F9	S I	SYBR GREEN	P69	Unknown Sample	23.6622	-	GAPDH
F10	S I	SYBR GREEN	P70	Unknown Sample	20.6333	-	GAPDH
F11	S I	SYBR GREEN	P71	Unknown Sample	21.9833	-	GAPDH
F12	S I	SYBR GREEN	P72	Unknown Sample	21.1205	-	GAPDH
G1	S I	SYBR GREEN	P73	Unknown Sample	21.9177	-	GAPDH
G2	S I	SYBR GREEN	P74	Unknown Sample	21.1144	-	GAPDH
G3	S I	SYBR GREEN	P75	Unknown Sample	19.519	-	GAPDH
G4	S I	SYBR GREEN	P76	Unknown Sample	23.6809	-	GAPDH
G5	S I	SYBR GREEN	P77	Unknown Sample	19.048	-	GAPDH
G6	S I	SYBR GREEN	P78	Unknown Sample	19.3263	-	GAPDH
G7	S I	SYBR GREEN	P79	Unknown Sample	21.4688	-	GAPDH
G8	S I	SYBR GREEN	P80	Unknown Sample	23.7922	-	GAPDH
G9	S I	SYBR GREEN	P81	Unknown Sample	19.7703	-	GAPDH
G10	S I	SYBR GREEN	P82	Unknown Sample	18.5783	-	GAPDH
G11	S I	SYBR GREEN	P83	Unknown Sample	23.3363	-	GAPDH
G12	S I	SYBR GREEN	P84	Unknown Sample	21.7885	-	GAPDH
H1	S I	SYBR GREEN	P85	Unknown Sample	21.4783	-	GAPDH
H2	S I	SYBR GREEN	P86	Unknown Sample	19.1859	-	GAPDH
H3	S I	SYBR GREEN	P87	Unknown Sample	22.5526	-	GAPDH
H4	S I	SYBR GREEN	P88	Unknown Sample	24.6578	-	GAPDH
H5	S I	SYBR GREEN	P89	Unknown Sample	22.7152	-	GAPDH
H6	S I	SYBR GREEN	P90	Unknown Sample	21.0331	-	GAPDH
H7	S I	SYBR GREEN	P91	Unknown Sample	18.1286	-	GAPDH
H8	S I	SYBR GREEN	P92	Unknown Sample	22.246	-	GAPDH
H9	S I	SYBR GREEN	P93	Unknown Sample	18.4262	-	GAPDH
H10	S I	SYBR GREEN	P94	Unknown Sample	22.1435	-	GAPDH
H11	S I	SYBR GREEN	P95	Unknown Sample	19.7532	-	GAPDH
H12	S I	SYBR GREEN	P96	Unknown Sample	18.8615	-	GAPDH

## Sheet: Patient no.65-80
Experiment Information
Name	DLEU1_patient no.65-80
Operator	admin
Location	F:\keyan\7900HT\experiments\admin
Template	F:\keyan\7900HT\templates\SYBR Green 两步法.tmt
Tips
Data
Well	Subset ID	Reporter	S_Name	S_Type	Ct	Quantity	Gene
A1	S I	SYBR GREEN	P1	Unknown Sample	21.7636	-	DLEU1
A2	S I	SYBR GREEN	P2	Unknown Sample	22.7562	-	DLEU1
A3	S I	SYBR GREEN	P3	Unknown Sample	20.4842	-	DLEU1
A4	S I	SYBR GREEN	P4	Unknown Sample	21.3563	-	DLEU1
A5	S I	SYBR GREEN	P5	Unknown Sample	26.1534	-	DLEU1
A6	S I	SYBR GREEN	P6	Unknown Sample	21.2185	-	DLEU1
A7	S I	SYBR GREEN	P7	Unknown Sample	26.861	-	DLEU1
A8	S I	SYBR GREEN	P8	Unknown Sample	26.7402	-	DLEU1
A9	S I	SYBR GREEN	P9	Unknown Sample	25.8004	-	DLEU1
A10	S I	SYBR GREEN	P10	Unknown Sample	23.6785	-	DLEU1
A11	S I	SYBR GREEN	P11	Unknown Sample	26.5423	-	DLEU1
A12	S I	SYBR GREEN	P12	Unknown Sample	27.8973	-	DLEU1
B1	S I	SYBR GREEN	P13	Unknown Sample	28.5358	-	DLEU1
B2	S I	SYBR GREEN	P14	Unknown Sample	25.7155	-	DLEU1
B3	S I	SYBR GREEN	P15	Unknown Sample	26.0165	-	DLEU1
B4	S I	SYBR GREEN	P16	Unknown Sample	24.7093	-	DLEU1
B5	S I	SYBR GREEN	P17	Unknown Sample	23.902	-	DLEU1
B6	S I	SYBR GREEN	P18	Unknown Sample	25.9372	-	DLEU1
B7	S I	SYBR GREEN	P19	Unknown Sample	21.0957	-	DLEU1
B8	S I	SYBR GREEN	P20	Unknown Sample	25.1636	-	DLEU1
B9	S I	SYBR GREEN	P21	Unknown Sample	27.0776	-	DLEU1
B10	S I	SYBR GREEN	P22	Unknown Sample	26.2632	-	DLEU1
B11	S I	SYBR GREEN	P23	Unknown Sample	27.2594	-	DLEU1
B12	S I	SYBR GREEN	P24	Unknown Sample	24.4281	-	DLEU1
C1	S I	SYBR GREEN	P25	Unknown Sample	26.3479	-	DLEU1
C2	S I	SYBR GREEN	P26	Unknown Sample	21.9658	-	DLEU1
C3	S I	SYBR GREEN	P27	Unknown Sample	24.2794	-	DLEU1
C4	S I	SYBR GREEN	P28	Unknown Sample	24.8453	-	DLEU1
C5	S I	SYBR GREEN	P29	Unknown Sample	23.9788	-	DLEU1
C6	S I	SYBR GREEN	P30	Unknown Sample	23.3402	-	DLEU1
C7	S I	SYBR GREEN	P31	Unknown Sample	29.2302	-	DLEU1
C8	S I	SYBR GREEN	P32	Unknown Sample	25.2485	-	DLEU1
C9	S I	SYBR GREEN	P33	Unknown Sample	28.1844	-	DLEU1
C10	S I	SYBR GREEN	P34	Unknown Sample	24.2105	-	DLEU1
C11	S I	SYBR GREEN	P35	Unknown Sample	24.8434	-	DLEU1
C12	S I	SYBR GREEN	P36	Unknown Sample	23.5575	-	DLEU1
D1	S I	SYBR GREEN	P37	Unknown Sample	26.5199	-	DLEU1
D2	S I	SYBR GREEN	P38	Unknown Sample	26.7131	-	DLEU1
D3	S I	SYBR GREEN	P39	Unknown Sample	25.9901	-	DLEU1
D4	S I	SYBR GREEN	P40	Unknown Sample	26.4131	-	DLEU1
D5	S I	SYBR GREEN	P41	Unknown Sample	20.5987	-	DLEU1
D6	S I	SYBR GREEN	P42	Unknown Sample	20.7166	-	DLEU1
D7	S I	SYBR GREEN	P43	Unknown Sample	25.0057	-	DLEU1
D8	S I	SYBR GREEN	P44	Unknown Sample	28.8826	-	DLEU1
D9	S I	SYBR GREEN	P45	Unknown Sample	26.8132	-	DLEU1
D10	S I	SYBR GREEN	P46	Unknown Sample	19.6078	-	DLEU1
D11	S I	SYBR GREEN	P47	Unknown Sample	20.3434	-	DLEU1
D12	S I	SYBR GREEN	P48	Unknown Sample	20.2619	-	DLEU1
E1	S I	SYBR GREEN	P49	Unknown Sample	24.5898	-	GAPDH
E2	S I	SYBR GREEN	P50	Unknown Sample	22.3226	-	GAPDH
E3	S I	SYBR GREEN	P51	Unknown Sample	20.7678	-	GAPDH
E4	S I	SYBR GREEN	P52	Unknown Sample	22.2592	-	GAPDH
E5	S I	SYBR GREEN	P53	Unknown Sample	18.6855	-	GAPDH
E6	S I	SYBR GREEN	P54	Unknown Sample	24.684	-	GAPDH
E7	S I	SYBR GREEN	P55	Unknown Sample	20.1982	-	GAPDH
E8	S I	SYBR GREEN	P56	Unknown Sample	20.0375	-	GAPDH
E9	S I	SYBR GREEN	P57	Unknown Sample	22.0419	-	GAPDH
E10	S I	SYBR GREEN	P58	Unknown Sample	23.0869	-	GAPDH
E11	S I	SYBR GREEN	P59	Unknown Sample	18.4914	-	GAPDH
E12	S I	SYBR GREEN	P60	Unknown Sample	19.07	-	GAPDH
F1	S I	SYBR GREEN	P61	Unknown Sample	20.555	-	GAPDH
F2	S I	SYBR GREEN	P62	Unknown Sample	22.3553	-	GAPDH
F3	S I	SYBR GREEN	P63	Unknown Sample	24.207	-	GAPDH
F4	S I	SYBR GREEN	P64	Unknown Sample	18.2765	-	GAPDH
F5	S I	SYBR GREEN	P65	Unknown Sample	19.7839	-	GAPDH
F6	S I	SYBR GREEN	P66	Unknown Sample	20.2106	-	GAPDH
F7	S I	SYBR GREEN	P67	Unknown Sample	22.6863	-	GAPDH
F8	S I	SYBR GREEN	P68	Unknown Sample	20.8198	-	GAPDH
F9	S I	SYBR GREEN	P69	Unknown Sample	18.9081	-	GAPDH
F10	S I	SYBR GREEN	P70	Unknown Sample	20.0328	-	GAPDH
F11	S I	SYBR GREEN	P71	Unknown Sample	19.9909	-	GAPDH
F12	S I	SYBR GREEN	P72	Unknown Sample	24.1908	-	GAPDH
G1	S I	SYBR GREEN	P73	Unknown Sample	18.2151	-	GAPDH
G2	S I	SYBR GREEN	P74	Unknown Sample	18.7979	-	GAPDH
G3	S I	SYBR GREEN	P75	Unknown Sample	23.7363	-	GAPDH
G4	S I	SYBR GREEN	P76	Unknown Sample	19.4063	-	GAPDH
G5	S I	SYBR GREEN	P77	Unknown Sample	22.4454	-	GAPDH
G6	S I	SYBR GREEN	P78	Unknown Sample	22.6631	-	GAPDH
G7	S I	SYBR GREEN	P79	Unknown Sample	21.2886	-	GAPDH
G8	S I	SYBR GREEN	P80	Unknown Sample	20.9857	-	GAPDH
G9	S I	SYBR GREEN	P81	Unknown Sample	20.4527	-	GAPDH
G10	S I	SYBR GREEN	P82	Unknown Sample	24.0754	-	GAPDH
G11	S I	SYBR GREEN	P83	Unknown Sample	24.9836	-	GAPDH
G12	S I	SYBR GREEN	P84	Unknown Sample	18.2035	-	GAPDH
H1	S I	SYBR GREEN	P85	Unknown Sample	21.7821	-	GAPDH
H2	S I	SYBR GREEN	P86	Unknown Sample	22.7953	-	GAPDH
H3	S I	SYBR GREEN	P87	Unknown Sample	23.3373	-	GAPDH
H4	S I	SYBR GREEN	P88	Unknown Sample	20.2193	-	GAPDH
H5	S I	SYBR GREEN	P89	Unknown Sample	19.7766	-	GAPDH
H6	S I	SYBR GREEN	P90	Unknown Sample	22.7379	-	GAPDH
H7	S I	SYBR GREEN	P91	Unknown Sample	23.6143	-	GAPDH
H8	S I	SYBR GREEN	P92	Unknown Sample	21.2637	-	GAPDH
H9	S I	SYBR GREEN	P93	Unknown Sample	23.8572	-	GAPDH
H10	S I	SYBR GREEN	P94	Unknown Sample	21.0877	-	GAPDH
H11	S I	SYBR GREEN	P95	Unknown Sample	23.8428	-	GAPDH
H12	S I	SYBR GREEN	P96	Unknown Sample	21.7811	-	GAPDH

## Sheet: Patient no.81-96
Experiment Information
Name	DLEU1_patient no.81-96
Operator	admin
Location	F:\keyan\7900HT\experiments\admin
Template	F:\keyan\7900HT\templates\SYBR Green 两步法.tmt
Tips
Data
Well	Subset ID	Reporter	S_Name	S_Type	Ct	Quantity	Gene
A1	S I	SYBR GREEN	P1	Unknown Sample	24.6108	-	DLEU1
A2	S I	SYBR GREEN	P2	Unknown Sample	22.3971	-	DLEU1
A3	S I	SYBR GREEN	P3	Unknown Sample	22.7365	-	DLEU1
A4	S I	SYBR GREEN	P4	Unknown Sample	23.2445	-	DLEU1
A5	S I	SYBR GREEN	P5	Unknown Sample	20.8653	-	DLEU1
A6	S I	SYBR GREEN	P6	Unknown Sample	26.9513	-	DLEU1
A7	S I	SYBR GREEN	P7	Unknown Sample	20.8481	-	DLEU1
A8	S I	SYBR GREEN	P8	Unknown Sample	24.8847	-	DLEU1
A9	S I	SYBR GREEN	P9	Unknown Sample	25.7746	-	DLEU1
A10	S I	SYBR GREEN	P10	Unknown Sample	24.3663	-	DLEU1
A11	S I	SYBR GREEN	P11	Unknown Sample	24.171	-	DLEU1
A12	S I	SYBR GREEN	P12	Unknown Sample	24.4068	-	DLEU1
B1	S I	SYBR GREEN	P13	Unknown Sample	26.5824	-	DLEU1
B2	S I	SYBR GREEN	P14	Unknown Sample	22.9832	-	DLEU1
B3	S I	SYBR GREEN	P15	Unknown Sample	27.6241	-	DLEU1
B4	S I	SYBR GREEN	P16	Unknown Sample	26.029	-	DLEU1
B5	S I	SYBR GREEN	P17	Unknown Sample	21.194	-	DLEU1
B6	S I	SYBR GREEN	P18	Unknown Sample	21.893	-	DLEU1
B7	S I	SYBR GREEN	P19	Unknown Sample	25.4164	-	DLEU1
B8	S I	SYBR GREEN	P20	Unknown Sample	25.8358	-	DLEU1
B9	S I	SYBR GREEN	P21	Unknown Sample	24.358	-	DLEU1
B10	S I	SYBR GREEN	P22	Unknown Sample	21.2434	-	DLEU1
B11	S I	SYBR GREEN	P23	Unknown Sample	21.0315	-	DLEU1
B12	S I	SYBR GREEN	P24	Unknown Sample	27.2896	-	DLEU1
C1	S I	SYBR GREEN	P25	Unknown Sample	23.7692	-	DLEU1
C2	S I	SYBR GREEN	P26	Unknown Sample	23.537	-	DLEU1
C3	S I	SYBR GREEN	P27	Unknown Sample	26.5261	-	DLEU1
C4	S I	SYBR GREEN	P28	Unknown Sample	23.9594	-	DLEU1
C5	S I	SYBR GREEN	P29	Unknown Sample	23.3038	-	DLEU1
C6	S I	SYBR GREEN	P30	Unknown Sample	21.148	-	DLEU1
C7	S I	SYBR GREEN	P31	Unknown Sample	24.024	-	DLEU1
C8	S I	SYBR GREEN	P32	Unknown Sample	21.3965	-	DLEU1
C9	S I	SYBR GREEN	P33	Unknown Sample	22.3424	-	DLEU1
C10	S I	SYBR GREEN	P34	Unknown Sample	21.5473	-	DLEU1
C11	S I	SYBR GREEN	P35	Unknown Sample	23.8227	-	DLEU1
C12	S I	SYBR GREEN	P36	Unknown Sample	20.5427	-	DLEU1
D1	S I	SYBR GREEN	P37	Unknown Sample	26.4826	-	DLEU1
D2	S I	SYBR GREEN	P38	Unknown Sample	21.0891	-	DLEU1
D3	S I	SYBR GREEN	P39	Unknown Sample	25.9138	-	DLEU1
D4	S I	SYBR GREEN	P40	Unknown Sample	24.4688	-	DLEU1
D5	S I	SYBR GREEN	P41	Unknown Sample	26.4584	-	DLEU1
D6	S I	SYBR GREEN	P42	Unknown Sample	29.0642	-	DLEU1
D7	S I	SYBR GREEN	P43	Unknown Sample	26.7066	-	DLEU1
D8	S I	SYBR GREEN	P44	Unknown Sample	26.4858	-	DLEU1
D9	S I	SYBR GREEN	P45	Unknown Sample	24.8333	-	DLEU1
D10	S I	SYBR GREEN	P46	Unknown Sample	21.409	-	DLEU1
D11	S I	SYBR GREEN	P47	Unknown Sample	20.5084	-	DLEU1
D12	S I	SYBR GREEN	P48	Unknown Sample	26.7103	-	DLEU1
E1	S I	SYBR GREEN	P49	Unknown Sample	18.1492	-	GAPDH
E2	S I	SYBR GREEN	P50	Unknown Sample	22.3474	-	GAPDH
E3	S I	SYBR GREEN	P51	Unknown Sample	23.3008	-	GAPDH
E4	S I	SYBR GREEN	P52	Unknown Sample	18.4899	-	GAPDH
E5	S I	SYBR GREEN	P53	Unknown Sample	23.8565	-	GAPDH
E6	S I	SYBR GREEN	P54	Unknown Sample	21.3608	-	GAPDH
E7	S I	SYBR GREEN	P55	Unknown Sample	18.3345	-	GAPDH
E8	S I	SYBR GREEN	P56	Unknown Sample	22.6805	-	GAPDH
E9	S I	SYBR GREEN	P57	Unknown Sample	23.5072	-	GAPDH
E10	S I	SYBR GREEN	P58	Unknown Sample	22.9067	-	GAPDH
E11	S I	SYBR GREEN	P59	Unknown Sample	18.3966	-	GAPDH
E12	S I	SYBR GREEN	P60	Unknown Sample	24.9152	-	GAPDH
F1	S I	SYBR GREEN	P61	Unknown Sample	21.5237	-	GAPDH
F2	S I	SYBR GREEN	P62	Unknown Sample	21.8566	-	GAPDH
F3	S I	SYBR GREEN	P63	Unknown Sample	23.2066	-	GAPDH
F4	S I	SYBR GREEN	P64	Unknown Sample	22.4465	-	GAPDH
F5	S I	SYBR GREEN	P65	Unknown Sample	18.3418	-	GAPDH
F6	S I	SYBR GREEN	P66	Unknown Sample	18.3644	-	GAPDH
F7	S I	SYBR GREEN	P67	Unknown Sample	21.5407	-	GAPDH
F8	S I	SYBR GREEN	P68	Unknown Sample	18.3279	-	GAPDH
F9	S I	SYBR GREEN	P69	Unknown Sample	20.284	-	GAPDH
F10	S I	SYBR GREEN	P70	Unknown Sample	21.2434	-	GAPDH
F11	S I	SYBR GREEN	P71	Unknown Sample	18.8233	-	GAPDH
F12	S I	SYBR GREEN	P72	Unknown Sample	20.0336	-	GAPDH
G1	S I	SYBR GREEN	P73	Unknown Sample	20.0673	-	GAPDH
G2	S I	SYBR GREEN	P74	Unknown Sample	22.9956	-	GAPDH
G3	S I	SYBR GREEN	P75	Unknown Sample	18.561	-	GAPDH
G4	S I	SYBR GREEN	P76	Unknown Sample	21.2486	-	GAPDH
G5	S I	SYBR GREEN	P77	Unknown Sample	18.7615	-	GAPDH
G6	S I	SYBR GREEN	P78	Unknown Sample	22.08	-	GAPDH
G7	S I	SYBR GREEN	P79	Unknown Sample	22.6473	-	GAPDH
G8	S I	SYBR GREEN	P80	Unknown Sample	23.6147	-	GAPDH
G9	S I	SYBR GREEN	P81	Unknown Sample	18.7131	-	GAPDH
G10	S I	SYBR GREEN	P82	Unknown Sample	24.8363	-	GAPDH
G11	S I	SYBR GREEN	P83	Unknown Sample	23.9662	-	GAPDH
G12	S I	SYBR GREEN	P84	Unknown Sample	19.222	-	GAPDH
H1	S I	SYBR GREEN	P85	Unknown Sample	20.2744	-	GAPDH
H2	S I	SYBR GREEN	P86	Unknown Sample	23.8249	-	GAPDH
H3	S I	SYBR GREEN	P87	Unknown Sample	18.9201	-	GAPDH
H4	S I	SYBR GREEN	P88	Unknown Sample	21.9147	-	GAPDH
H5	S I	SYBR GREEN	P89	Unknown Sample	23.3439	-	GAPDH
H6	S I	SYBR GREEN	P90	Unknown Sample	20.5075	-	GAPDH
H7	S I	SYBR GREEN	P91	Unknown Sample	24.581	-	GAPDH
H8	S I	SYBR GREEN	P92	Unknown Sample	24.7598	-	GAPDH
H9	S I	SYBR GREEN	P93	Unknown Sample	24.5643	-	GAPDH
H10	S I	SYBR GREEN	P94	Unknown Sample	22.5054	-	GAPDH
H11	S I	SYBR GREEN	P95	Unknown Sample	18.9682	-	GAPDH
H12	S I	SYBR GREEN	P96	Unknown Sample	23.3586	-	GAPDH

## Sheet: Patient no.97-112
Experiment Information
Name	DLEU1_patient no.97-112
Operator	admin
Location	F:\keyan\7900HT\experiments\admin
Template	F:\keyan\7900HT\templates\SYBR Green 两步法.tmt
Tips
Data
Well	Subset ID	Reporter	S_Name	S_Type	Ct	Quantity	Gene
A1	S I	SYBR GREEN	P1	Unknown Sample	28.1808	-	DLEU1
A2	S I	SYBR GREEN	P2	Unknown Sample	28.0346	-	DLEU1
A3	S I	SYBR GREEN	P3	Unknown Sample	26.5457	-	DLEU1
A4	S I	SYBR GREEN	P4	Unknown Sample	26.9349	-	DLEU1
A5	S I	SYBR GREEN	P5	Unknown Sample	23.098	-	DLEU1
A6	S I	SYBR GREEN	P6	Unknown Sample	25.4788	-	DLEU1
A7	S I	SYBR GREEN	P7	Unknown Sample	26.0374	-	DLEU1
A8	S I	SYBR GREEN	P8	Unknown Sample	26.7975	-	DLEU1
A9	S I	SYBR GREEN	P9	Unknown Sample	21.8759	-	DLEU1
A10	S I	SYBR GREEN	P10	Unknown Sample	22.1208	-	DLEU1
A11	S I	SYBR GREEN	P11	Unknown Sample	22.6733	-	DLEU1
A12	S I	SYBR GREEN	P12	Unknown Sample	25.0353	-	DLEU1
B1	S I	SYBR GREEN	P13	Unknown Sample	19.9879	-	DLEU1
B2	S I	SYBR GREEN	P14	Unknown Sample	26.2823	-	DLEU1
B3	S I	SYBR GREEN	P15	Unknown Sample	23.4108	-	DLEU1
B4	S I	SYBR GREEN	P16	Unknown Sample	25.6619	-	DLEU1
B5	S I	SYBR GREEN	P17	Unknown Sample	25.9822	-	DLEU1
B6	S I	SYBR GREEN	P18	Unknown Sample	26.451	-	DLEU1
B7	S I	SYBR GREEN	P19	Unknown Sample	26.0758	-	DLEU1
B8	S I	SYBR GREEN	P20	Unknown Sample	23.6507	-	DLEU1
B9	S I	SYBR GREEN	P21	Unknown Sample	24.062	-	DLEU1
B10	S I	SYBR GREEN	P22	Unknown Sample	25.3663	-	DLEU1
B11	S I	SYBR GREEN	P23	Unknown Sample	28.1342	-	DLEU1
B12	S I	SYBR GREEN	P24	Unknown Sample	25.1628	-	DLEU1
C1	S I	SYBR GREEN	P25	Unknown Sample	23.3959	-	DLEU1
C2	S I	SYBR GREEN	P26	Unknown Sample	23.696	-	DLEU1
C3	S I	SYBR GREEN	P27	Unknown Sample	26.1114	-	DLEU1
C4	S I	SYBR GREEN	P28	Unknown Sample	24.7109	-	DLEU1
C5	S I	SYBR GREEN	P29	Unknown Sample	21.1427	-	DLEU1
C6	S I	SYBR GREEN	P30	Unknown Sample	24.601	-	DLEU1
C7	S I	SYBR GREEN	P31	Unknown Sample	22.6752	-	DLEU1
C8	S I	SYBR GREEN	P32	Unknown Sample	26.0047	-	DLEU1
C9	S I	SYBR GREEN	P33	Unknown Sample	24.2755	-	DLEU1
C10	S I	SYBR GREEN	P34	Unknown Sample	26.5923	-	DLEU1
C11	S I	SYBR GREEN	P35	Unknown Sample	26.9713	-	DLEU1
C12	S I	SYBR GREEN	P36	Unknown Sample	24.8123	-	DLEU1
D1	S I	SYBR GREEN	P37	Unknown Sample	27.6425	-	DLEU1
D2	S I	SYBR GREEN	P38	Unknown Sample	28.0546	-	DLEU1
D3	S I	SYBR GREEN	P39	Unknown Sample	25.0632	-	DLEU1
D4	S I	SYBR GREEN	P40	Unknown Sample	25.4923	-	DLEU1
D5	S I	SYBR GREEN	P41	Unknown Sample	24.5276	-	DLEU1
D6	S I	SYBR GREEN	P42	Unknown Sample	27.8774	-	DLEU1
D7	S I	SYBR GREEN	P43	Unknown Sample	23.0628	-	DLEU1
D8	S I	SYBR GREEN	P44	Unknown Sample	25.8451	-	DLEU1
D9	S I	SYBR GREEN	P45	Unknown Sample	23.2971	-	DLEU1
D10	S I	SYBR GREEN	P46	Unknown Sample	24.4595	-	DLEU1
D11	S I	SYBR GREEN	P47	Unknown Sample	24.9304	-	DLEU1
D12	S I	SYBR GREEN	P48	Unknown Sample	24.2841	-	DLEU1
E1	S I	SYBR GREEN	P49	Unknown Sample	22.7468	-	GAPDH
E2	S I	SYBR GREEN	P50	Unknown Sample	18.1718	-	GAPDH
E3	S I	SYBR GREEN	P51	Unknown Sample	20.3532	-	GAPDH
E4	S I	SYBR GREEN	P52	Unknown Sample	24.4048	-	GAPDH
E5	S I	SYBR GREEN	P53	Unknown Sample	18.0604	-	GAPDH
E6	S I	SYBR GREEN	P54	Unknown Sample	22.5876	-	GAPDH
E7	S I	SYBR GREEN	P55	Unknown Sample	19.0842	-	GAPDH
E8	S I	SYBR GREEN	P56	Unknown Sample	22.5705	-	GAPDH
E9	S I	SYBR GREEN	P57	Unknown Sample	20.3254	-	GAPDH
E10	S I	SYBR GREEN	P58	Unknown Sample	22.876	-	GAPDH
E11	S I	SYBR GREEN	P59	Unknown Sample	21.4415	-	GAPDH
E12	S I	SYBR GREEN	P60	Unknown Sample	19.3315	-	GAPDH
F1	S I	SYBR GREEN	P61	Unknown Sample	18.4672	-	GAPDH
F2	S I	SYBR GREEN	P62	Unknown Sample	19.2169	-	GAPDH
F3	S I	SYBR GREEN	P63	Unknown Sample	18.9981	-	GAPDH
F4	S I	SYBR GREEN	P64	Unknown Sample	19.0429	-	GAPDH
F5	S I	SYBR GREEN	P65	Unknown Sample	19.8038	-	GAPDH
F6	S I	SYBR GREEN	P66	Unknown Sample	19.3193	-	GAPDH
F7	S I	SYBR GREEN	P67	Unknown Sample	19.0135	-	GAPDH
F8	S I	SYBR GREEN	P68	Unknown Sample	23.2124	-	GAPDH
F9	S I	SYBR GREEN	P69	Unknown Sample	23.8172	-	GAPDH
F10	S I	SYBR GREEN	P70	Unknown Sample	19.2596	-	GAPDH
F11	S I	SYBR GREEN	P71	Unknown Sample	19.882	-	GAPDH
F12	S I	SYBR GREEN	P72	Unknown Sample	19.6079	-	GAPDH
G1	S I	SYBR GREEN	P73	Unknown Sample	19.8707	-	GAPDH
G2	S I	SYBR GREEN	P74	Unknown Sample	23.0009	-	GAPDH
G3	S I	SYBR GREEN	P75	Unknown Sample	22.4561	-	GAPDH
G4	S I	SYBR GREEN	P76	Unknown Sample	24.5202	-	GAPDH
G5	S I	SYBR GREEN	P77	Unknown Sample	23.1496	-	GAPDH
G6	S I	SYBR GREEN	P78	Unknown Sample	21.6856	-	GAPDH
G7	S I	SYBR GREEN	P79	Unknown Sample	20.1363	-	GAPDH
G8	S I	SYBR GREEN	P80	Unknown Sample	24.0105	-	GAPDH
G9	S I	SYBR GREEN	P81	Unknown Sample	23.1944	-	GAPDH
G10	S I	SYBR GREEN	P82	Unknown Sample	22.8365	-	GAPDH
G11	S I	SYBR GREEN	P83	Unknown Sample	20.5978	-	GAPDH
G12	S I	SYBR GREEN	P84	Unknown Sample	21.7625	-	GAPDH
H1	S I	SYBR GREEN	P85	Unknown Sample	18.1125	-	GAPDH
H2	S I	SYBR GREEN	P86	Unknown Sample	21.463	-	GAPDH
H3	S I	SYBR GREEN	P87	Unknown Sample	20.7749	-	GAPDH
H4	S I	SYBR GREEN	P88	Unknown Sample	21.0544	-	GAPDH
H5	S I	SYBR GREEN	P89	Unknown Sample	18.4988	-	GAPDH
H6	S I	SYBR GREEN	P90	Unknown Sample	20.3285	-	GAPDH
H7	S I	SYBR GREEN	P91	Unknown Sample	20.9724	-	GAPDH
H8	S I	SYBR GREEN	P92	Unknown Sample	22.6068	-	GAPDH
H9	S I	SYBR GREEN	P93	Unknown Sample	18.152	-	GAPDH
H10	S I	SYBR GREEN	P94	Unknown Sample	21.9187	-	GAPDH
H11	S I	SYBR GREEN	P95	Unknown Sample	18.469	-	GAPDH
H12	S I	SYBR GREEN	P96	Unknown Sample	20.713	-	GAPDH

## Sheet: Patient no.113-128
Experiment Information
Name	DLEU1_patient no.113-128
Operator	admin
Location	F:\keyan\7900HT\experiments\admin
Template	F:\keyan\7900HT\templates\SYBR Green 两步法.tmt
Tips
Data
Well	Subset ID	Reporter	S_Name	S_Type	Ct	Quantity	Gene
A1	S I	SYBR GREEN	P1	Unknown Sample	24.1781	-	DLEU1
A2	S I	SYBR GREEN	P2	Unknown Sample	24.0963	-	DLEU1
A3	S I	SYBR GREEN	P3	Unknown Sample	20.6099	-	DLEU1
A4	S I	SYBR GREEN	P4	Unknown Sample	23.1404	-	DLEU1
A5	S I	SYBR GREEN	P5	Unknown Sample	23.3274	-	DLEU1
A6	S I	SYBR GREEN	P6	Unknown Sample	27.8679	-	DLEU1
A7	S I	SYBR GREEN	P7	Unknown Sample	24.6475	-	DLEU1
A8	S I	SYBR GREEN	P8	Unknown Sample	28.3654	-	DLEU1
A9	S I	SYBR GREEN	P9	Unknown Sample	28.0202	-	DLEU1
A10	S I	SYBR GREEN	P10	Unknown Sample	26.2591	-	DLEU1
A11	S I	SYBR GREEN	P11	Unknown Sample	26.9256	-	DLEU1
A12	S I	SYBR GREEN	P12	Unknown Sample	25.426	-	DLEU1
B1	S I	SYBR GREEN	P13	Unknown Sample	25.6044	-	DLEU1
B2	S I	SYBR GREEN	P14	Unknown Sample	20.9053	-	DLEU1
B3	S I	SYBR GREEN	P15	Unknown Sample	21.8384	-	DLEU1
B4	S I	SYBR GREEN	P16	Unknown Sample	27.7922	-	DLEU1
B5	S I	SYBR GREEN	P17	Unknown Sample	23.5414	-	DLEU1
B6	S I	SYBR GREEN	P18	Unknown Sample	23.6735	-	DLEU1
B7	S I	SYBR GREEN	P19	Unknown Sample	22.0496	-	DLEU1
B8	S I	SYBR GREEN	P20	Unknown Sample	24.7308	-	DLEU1
B9	S I	SYBR GREEN	P21	Unknown Sample	25.8837	-	DLEU1
B10	S I	SYBR GREEN	P22	Unknown Sample	22.046	-	DLEU1
B11	S I	SYBR GREEN	P23	Unknown Sample	21.4021	-	DLEU1
B12	S I	SYBR GREEN	P24	Unknown Sample	25.6518	-	DLEU1
C1	S I	SYBR GREEN	P25	Unknown Sample	26.8563	-	DLEU1
C2	S I	SYBR GREEN	P26	Unknown Sample	27.5111	-	DLEU1
C3	S I	SYBR GREEN	P27	Unknown Sample	20.7154	-	DLEU1
C4	S I	SYBR GREEN	P28	Unknown Sample	25.7045	-	DLEU1
C5	S I	SYBR GREEN	P29	Unknown Sample	27.2494	-	DLEU1
C6	S I	SYBR GREEN	P30	Unknown Sample	21.5168	-	DLEU1
C7	S I	SYBR GREEN	P31	Unknown Sample	22.5672	-	DLEU1
C8	S I	SYBR GREEN	P32	Unknown Sample	26.1656	-	DLEU1
C9	S I	SYBR GREEN	P33	Unknown Sample	22.6584	-	DLEU1
C10	S I	SYBR GREEN	P34	Unknown Sample	26.0659	-	DLEU1
C11	S I	SYBR GREEN	P35	Unknown Sample	25.1092	-	DLEU1
C12	S I	SYBR GREEN	P36	Unknown Sample	22.5625	-	DLEU1
D1	S I	SYBR GREEN	P37	Unknown Sample	22.9296	-	DLEU1
D2	S I	SYBR GREEN	P38	Unknown Sample	25.1048	-	DLEU1
D3	S I	SYBR GREEN	P39	Unknown Sample	22.0562	-	DLEU1
D4	S I	SYBR GREEN	P40	Unknown Sample	23.3199	-	DLEU1
D5	S I	SYBR GREEN	P41	Unknown Sample	26.4344	-	DLEU1
D6	S I	SYBR GREEN	P42	Unknown Sample	23.1577	-	DLEU1
D7	S I	SYBR GREEN	P43	Unknown Sample	27.8399	-	DLEU1
D8	S I	SYBR GREEN	P44	Unknown Sample	24.4825	-	DLEU1
D9	S I	SYBR GREEN	P45	Unknown Sample	23.7536	-	DLEU1
D10	S I	SYBR GREEN	P46	Unknown Sample	20.3389	-	DLEU1
D11	S I	SYBR GREEN	P47	Unknown Sample	24.4684	-	DLEU1
D12	S I	SYBR GREEN	P48	Unknown Sample	22.1717	-	DLEU1
E1	S I	SYBR GREEN	P49	Unknown Sample	22.1556	-	GAPDH
E2	S I	SYBR GREEN	P50	Unknown Sample	22.8852	-	GAPDH
E3	S I	SYBR GREEN	P51	Unknown Sample	24.7573	-	GAPDH
E4	S I	SYBR GREEN	P52	Unknown Sample	20.744	-	GAPDH
E5	S I	SYBR GREEN	P53	Unknown Sample	22.0884	-	GAPDH
E6	S I	SYBR GREEN	P54	Unknown Sample	18.5892	-	GAPDH
E7	S I	SYBR GREEN	P55	Unknown Sample	20.3491	-	GAPDH
E8	S I	SYBR GREEN	P56	Unknown Sample	18.8352	-	GAPDH
E9	S I	SYBR GREEN	P57	Unknown Sample	24.9189	-	GAPDH
E10	S I	SYBR GREEN	P58	Unknown Sample	21.6825	-	GAPDH
E11	S I	SYBR GREEN	P59	Unknown Sample	22.4667	-	GAPDH
E12	S I	SYBR GREEN	P60	Unknown Sample	18.6122	-	GAPDH
F1	S I	SYBR GREEN	P61	Unknown Sample	19.9363	-	GAPDH
F2	S I	SYBR GREEN	P62	Unknown Sample	21.126	-	GAPDH
F3	S I	SYBR GREEN	P63	Unknown Sample	22.3888	-	GAPDH
F4	S I	SYBR GREEN	P64	Unknown Sample	23.5976	-	GAPDH
F5	S I	SYBR GREEN	P65	Unknown Sample	18.0293	-	GAPDH
F6	S I	SYBR GREEN	P66	Unknown Sample	19.9142	-	GAPDH
F7	S I	SYBR GREEN	P67	Unknown Sample	19.433	-	GAPDH
F8	S I	SYBR GREEN	P68	Unknown Sample	20.1198	-	GAPDH
F9	S I	SYBR GREEN	P69	Unknown Sample	24.7439	-	GAPDH
F10	S I	SYBR GREEN	P70	Unknown Sample	19.2254	-	GAPDH
F11	S I	SYBR GREEN	P71	Unknown Sample	23.3643	-	GAPDH
F12	S I	SYBR GREEN	P72	Unknown Sample	21.1698	-	GAPDH
G1	S I	SYBR GREEN	P73	Unknown Sample	24.5077	-	GAPDH
G2	S I	SYBR GREEN	P74	Unknown Sample	23.5883	-	GAPDH
G3	S I	SYBR GREEN	P75	Unknown Sample	20.8264	-	GAPDH
G4	S I	SYBR GREEN	P76	Unknown Sample	21.47	-	GAPDH
G5	S I	SYBR GREEN	P77	Unknown Sample	22.4581	-	GAPDH
G6	S I	SYBR GREEN	P78	Unknown Sample	23.46	-	GAPDH
G7	S I	SYBR GREEN	P79	Unknown Sample	19.438	-	GAPDH
G8	S I	SYBR GREEN	P80	Unknown Sample	24.0646	-	GAPDH
G9	S I	SYBR GREEN	P81	Unknown Sample	24.1079	-	GAPDH
G10	S I	SYBR GREEN	P82	Unknown Sample	24.4909	-	GAPDH
G11	S I	SYBR GREEN	P83	Unknown Sample	18.6951	-	GAPDH
G12	S I	SYBR GREEN	P84	Unknown Sample	23.0194	-	GAPDH
H1	S I	SYBR GREEN	P85	Unknown Sample	20.7109	-	GAPDH
H2	S I	SYBR GREEN	P86	Unknown Sample	21.4446	-	GAPDH
H3	S I	SYBR GREEN	P87	Unknown Sample	21.9563	-	GAPDH
H4	S I	SYBR GREEN	P88	Unknown Sample	23.8207	-	GAPDH
H5	S I	SYBR GREEN	P89	Unknown Sample	22.2968	-	GAPDH
H6	S I	SYBR GREEN	P90	Unknown Sample	18.8175	-	GAPDH
H7	S I	SYBR GREEN	P91	Unknown Sample	23.3197	-	GAPDH
H8	S I	SYBR GREEN	P92	Unknown Sample	24.8693	-	GAPDH
H9	S I	SYBR GREEN	P93	Unknown Sample	22.2273	-	GAPDH
H10	S I	SYBR GREEN	P94	Unknown Sample	24.0122	-	GAPDH
H11	S I	SYBR GREEN	P95	Unknown Sample	18.3584	-	GAPDH
H12	S I	SYBR GREEN	P96	Unknown Sample	22.566	-	GAPDH

## Sheet: Control no.1-16
Experiment Information
Name	DLEU1_Control no.1-16
Operator	admin
Location	F:\keyan\7900HT\experiments\admin
Template	F:\keyan\7900HT\templates\SYBR Green 两步法.tmt
Tips
Data
Well	Subset ID	Reporter	S_Name	S_Type	Ct	Quantity	Gene
A1	S I	SYBR GREEN	C1	Unknown Sample	20.9664	-	DLEU1
A2	S I	SYBR GREEN	C2	Unknown Sample	23.3499	-	DLEU1
A3	S I	SYBR GREEN	C3	Unknown Sample	26.3997	-	DLEU1
A4	S I	SYBR GREEN	C4	Unknown Sample	28.8057	-	DLEU1
A5	S I	SYBR GREEN	C5	Unknown Sample	29.4676	-	DLEU1
A6	S I	SYBR GREEN	C6	Unknown Sample	25.1457	-	DLEU1
A7	S I	SYBR GREEN	C7	Unknown Sample	30.2478	-	DLEU1
A8	S I	SYBR GREEN	C8	Unknown Sample	25.99	-	DLEU1
A9	S I	SYBR GREEN	C9	Unknown Sample	26.4847	-	DLEU1
A10	S I	SYBR GREEN	C10	Unknown Sample	22.6897	-	DLEU1
A11	S I	SYBR GREEN	C11	Unknown Sample	28.8387	-	DLEU1
A12	S I	SYBR GREEN	C12	Unknown Sample	26.897	-	DLEU1
B1	S I	SYBR GREEN	C13	Unknown Sample	27.0478	-	DLEU1
B2	S I	SYBR GREEN	C14	Unknown Sample	25.2399	-	DLEU1
B3	S I	SYBR GREEN	C15	Unknown Sample	25.6602	-	DLEU1
B4	S I	SYBR GREEN	C16	Unknown Sample	21.1264	-	DLEU1
B5	S I	SYBR GREEN	C17	Unknown Sample	23.7776	-	DLEU1
B6	S I	SYBR GREEN	C18	Unknown Sample	25.4852	-	DLEU1
B7	S I	SYBR GREEN	C19	Unknown Sample	25.7722	-	DLEU1
B8	S I	SYBR GREEN	C20	Unknown Sample	28.7785	-	DLEU1
B9	S I	SYBR GREEN	C21	Unknown Sample	25.1837	-	DLEU1
B10	S I	SYBR GREEN	C22	Unknown Sample	29.0429	-	DLEU1
B11	S I	SYBR GREEN	C23	Unknown Sample	29.7233	-	DLEU1
B12	S I	SYBR GREEN	C24	Unknown Sample	27.221	-	DLEU1
C1	S I	SYBR GREEN	C25	Unknown Sample	24.1045	-	DLEU1
C2	S I	SYBR GREEN	C26	Unknown Sample	27.0425	-	DLEU1
C3	S I	SYBR GREEN	C27	Unknown Sample	27.2337	-	DLEU1
C4	S I	SYBR GREEN	C28	Unknown Sample	21.3416	-	DLEU1
C5	S I	SYBR GREEN	C29	Unknown Sample	27.238	-	DLEU1
C6	S I	SYBR GREEN	C30	Unknown Sample	27.8734	-	DLEU1
C7	S I	SYBR GREEN	C31	Unknown Sample	26.5732	-	DLEU1
C8	S I	SYBR GREEN	C32	Unknown Sample	21.814	-	DLEU1
C9	S I	SYBR GREEN	C33	Unknown Sample	24.8365	-	DLEU1
C10	S I	SYBR GREEN	C34	Unknown Sample	26.8843	-	DLEU1
C11	S I	SYBR GREEN	C35	Unknown Sample	23.2701	-	DLEU1
C12	S I	SYBR GREEN	C36	Unknown Sample	28.2185	-	DLEU1
D1	S I	SYBR GREEN	C37	Unknown Sample	24.6889	-	DLEU1
D2	S I	SYBR GREEN	C38	Unknown Sample	24.2638	-	DLEU1
D3	S I	SYBR GREEN	C39	Unknown Sample	22.6407	-	DLEU1
D4	S I	SYBR GREEN	C40	Unknown Sample	22.3653	-	DLEU1
D5	S I	SYBR GREEN	C41	Unknown Sample	25.093	-	DLEU1
D6	S I	SYBR GREEN	C42	Unknown Sample	26.3081	-	DLEU1
D7	S I	SYBR GREEN	C43	Unknown Sample	20.9687	-	DLEU1
D8	S I	SYBR GREEN	C44	Unknown Sample	21.8371	-	DLEU1
D9	S I	SYBR GREEN	C45	Unknown Sample	20.5112	-	DLEU1
D10	S I	SYBR GREEN	C46	Unknown Sample	21.2124	-	DLEU1
D11	S I	SYBR GREEN	C47	Unknown Sample	23.1792	-	DLEU1
D12	S I	SYBR GREEN	C48	Unknown Sample	23.0005	-	DLEU1
E1	S I	SYBR GREEN	C49	Unknown Sample	18.6579	-	GAPDH
E2	S I	SYBR GREEN	C50	Unknown Sample	24.6664	-	GAPDH
E3	S I	SYBR GREEN	C51	Unknown Sample	20.4226	-	GAPDH
E4	S I	SYBR GREEN	C52	Unknown Sample	23.33	-	GAPDH
E5	S I	SYBR GREEN	C53	Unknown Sample	22.5924	-	GAPDH
E6	S I	SYBR GREEN	C54	Unknown Sample	19.6577	-	GAPDH
E7	S I	SYBR GREEN	C55	Unknown Sample	18.3466	-	GAPDH
E8	S I	SYBR GREEN	C56	Unknown Sample	21.1651	-	GAPDH
E9	S I	SYBR GREEN	C57	Unknown Sample	22.5519	-	GAPDH
E10	S I	SYBR GREEN	C58	Unknown Sample	19.9155	-	GAPDH
E11	S I	SYBR GREEN	C59	Unknown Sample	21.9507	-	GAPDH
E12	S I	SYBR GREEN	C60	Unknown Sample	19.6391	-	GAPDH
F1	S I	SYBR GREEN	C61	Unknown Sample	24.6935	-	GAPDH
F2	S I	SYBR GREEN	C62	Unknown Sample	18.2326	-	GAPDH
F3	S I	SYBR GREEN	C63	Unknown Sample	23.4042	-	GAPDH
F4	S I	SYBR GREEN	C64	Unknown Sample	22.9907	-	GAPDH
F5	S I	SYBR GREEN	C65	Unknown Sample	19.6616	-	GAPDH
F6	S I	SYBR GREEN	C66	Unknown Sample	22.5231	-	GAPDH
F7	S I	SYBR GREEN	C67	Unknown Sample	19.3813	-	GAPDH
F8	S I	SYBR GREEN	C68	Unknown Sample	22.3905	-	GAPDH
F9	S I	SYBR GREEN	C69	Unknown Sample	21.129	-	GAPDH
F10	S I	SYBR GREEN	C70	Unknown Sample	20.4137	-	GAPDH
F11	S I	SYBR GREEN	C71	Unknown Sample	18.7528	-	GAPDH
F12	S I	SYBR GREEN	C72	Unknown Sample	21.9909	-	GAPDH
G1	S I	SYBR GREEN	C73	Unknown Sample	21.168	-	GAPDH
G2	S I	SYBR GREEN	C74	Unknown Sample	24.1173	-	GAPDH
G3	S I	SYBR GREEN	C75	Unknown Sample	20.1034	-	GAPDH
G4	S I	SYBR GREEN	C76	Unknown Sample	20.2675	-	GAPDH
G5	S I	SYBR GREEN	C77	Unknown Sample	21.7291	-	GAPDH
G6	S I	SYBR GREEN	C78	Unknown Sample	19.5817	-	GAPDH
G7	S I	SYBR GREEN	C79	Unknown Sample	18.0152	-	GAPDH
G8	S I	SYBR GREEN	C80	Unknown Sample	22.2639	-	GAPDH
G9	S I	SYBR GREEN	C81	Unknown Sample	22.2809	-	GAPDH
G10	S I	SYBR GREEN	C82	Unknown Sample	18.0822	-	GAPDH
G11	S I	SYBR GREEN	C83	Unknown Sample	19.7474	-	GAPDH
G12	S I	SYBR GREEN	C84	Unknown Sample	21.0418	-	GAPDH
H1	S I	SYBR GREEN	C85	Unknown Sample	22.4318	-	GAPDH
H2	S I	SYBR GREEN	C86	Unknown Sample	18.9409	-	GAPDH
H3	S I	SYBR GREEN	C87	Unknown Sample	24.1941	-	GAPDH
H4	S I	SYBR GREEN	C88	Unknown Sample	20.6685	-	GAPDH
H5	S I	SYBR GREEN	C89	Unknown Sample	18.3008	-	GAPDH
H6	S I	SYBR GREEN	C90	Unknown Sample	20.9246	-	GAPDH
H7	S I	SYBR GREEN	C91	Unknown Sample	21.1325	-	GAPDH
H8	S I	SYBR GREEN	C92	Unknown Sample	18.0321	-	GAPDH
H9	S I	SYBR GREEN	C93	Unknown Sample	23.7029	-	GAPDH
H10	S I	SYBR GREEN	C94	Unknown Sample	22.4091	-	GAPDH
H11	S I	SYBR GREEN	C95	Unknown Sample	21.5997	-	GAPDH
H12	S I	SYBR GREEN	C96	Unknown Sample	21.2599	-	GAPDH

## Sheet: Control no.17-32
Experiment Information
Name	DLEU1_Control no.17-32
Operator	admin
Location	F:\keyan\7900HT\experiments\admin
Template	F:\keyan\7900HT\templates\SYBR Green 两步法.tmt
Tips
Data
Well	Subset ID	Reporter	S_Name	S_Type	Ct	Quantity	Gene
A1	S I	SYBR GREEN	C1	Unknown Sample	25.7294	-	DLEU1
A2	S I	SYBR GREEN	C2	Unknown Sample	23.7608	-	DLEU1
A3	S I	SYBR GREEN	C3	Unknown Sample	22.6247	-	DLEU1
A4	S I	SYBR GREEN	C4	Unknown Sample	23.5258	-	DLEU1
A5	S I	SYBR GREEN	C5	Unknown Sample	28.8196	-	DLEU1
A6	S I	SYBR GREEN	C6	Unknown Sample	25.2681	-	DLEU1
A7	S I	SYBR GREEN	C7	Unknown Sample	20.7401	-	DLEU1
A8	S I	SYBR GREEN	C8	Unknown Sample	24.9037	-	DLEU1
A9	S I	SYBR GREEN	C9	Unknown Sample	22.882	-	DLEU1
A10	S I	SYBR GREEN	C10	Unknown Sample	27.4821	-	DLEU1
A11	S I	SYBR GREEN	C11	Unknown Sample	25.9626	-	DLEU1
A12	S I	SYBR GREEN	C12	Unknown Sample	23.3255	-	DLEU1
B1	S I	SYBR GREEN	C13	Unknown Sample	22.4578	-	DLEU1
B2	S I	SYBR GREEN	C14	Unknown Sample	25.5026	-	DLEU1
B3	S I	SYBR GREEN	C15	Unknown Sample	26.412	-	DLEU1
B4	S I	SYBR GREEN	C16	Unknown Sample	27.1075	-	DLEU1
B5	S I	SYBR GREEN	C17	Unknown Sample	23.4466	-	DLEU1
B6	S I	SYBR GREEN	C18	Unknown Sample	28.7416	-	DLEU1
B7	S I	SYBR GREEN	C19	Unknown Sample	27.0722	-	DLEU1
B8	S I	SYBR GREEN	C20	Unknown Sample	23.004	-	DLEU1
B9	S I	SYBR GREEN	C21	Unknown Sample	23.9291	-	DLEU1
B10	S I	SYBR GREEN	C22	Unknown Sample	23.8855	-	DLEU1
B11	S I	SYBR GREEN	C23	Unknown Sample	25.0866	-	DLEU1
B12	S I	SYBR GREEN	C24	Unknown Sample	28.3799	-	DLEU1
C1	S I	SYBR GREEN	C25	Unknown Sample	25.452	-	DLEU1
C2	S I	SYBR GREEN	C26	Unknown Sample	24.1686	-	DLEU1
C3	S I	SYBR GREEN	C27	Unknown Sample	24.8043	-	DLEU1
C4	S I	SYBR GREEN	C28	Unknown Sample	21.0131	-	DLEU1
C5	S I	SYBR GREEN	C29	Unknown Sample	23.6351	-	DLEU1
C6	S I	SYBR GREEN	C30	Unknown Sample	23.6309	-	DLEU1
C7	S I	SYBR GREEN	C31	Unknown Sample	24.7024	-	DLEU1
C8	S I	SYBR GREEN	C32	Unknown Sample	28.0116	-	DLEU1
C9	S I	SYBR GREEN	C33	Unknown Sample	26.1612	-	DLEU1
C10	S I	SYBR GREEN	C34	Unknown Sample	24.1047	-	DLEU1
C11	S I	SYBR GREEN	C35	Unknown Sample	22.8025	-	DLEU1
C12	S I	SYBR GREEN	C36	Unknown Sample	21.7802	-	DLEU1
D1	S I	SYBR GREEN	C37	Unknown Sample	25.9397	-	DLEU1
D2	S I	SYBR GREEN	C38	Unknown Sample	26.9219	-	DLEU1
D3	S I	SYBR GREEN	C39	Unknown Sample	24.5708	-	DLEU1
D4	S I	SYBR GREEN	C40	Unknown Sample	25.2054	-	DLEU1
D5	S I	SYBR GREEN	C41	Unknown Sample	24.7392	-	DLEU1
D6	S I	SYBR GREEN	C42	Unknown Sample	24.442	-	DLEU1
D7	S I	SYBR GREEN	C43	Unknown Sample	24.4822	-	DLEU1
D8	S I	SYBR GREEN	C44	Unknown Sample	29.2631	-	DLEU1
D9	S I	SYBR GREEN	C45	Unknown Sample	29.2001	-	DLEU1
D10	S I	SYBR GREEN	C46	Unknown Sample	24.2636	-	DLEU1
D11	S I	SYBR GREEN	C47	Unknown Sample	23.7769	-	DLEU1
D12	S I	SYBR GREEN	C48	Unknown Sample	21.7272	-	DLEU1
E1	S I	SYBR GREEN	C49	Unknown Sample	23.9856	-	GAPDH
E2	S I	SYBR GREEN	C50	Unknown Sample	20.5132	-	GAPDH
E3	S I	SYBR GREEN	C51	Unknown Sample	20.862	-	GAPDH
E4	S I	SYBR GREEN	C52	Unknown Sample	23.2579	-	GAPDH
E5	S I	SYBR GREEN	C53	Unknown Sample	21.2301	-	GAPDH
E6	S I	SYBR GREEN	C54	Unknown Sample	21.7857	-	GAPDH
E7	S I	SYBR GREEN	C55	Unknown Sample	18.0166	-	GAPDH
E8	S I	SYBR GREEN	C56	Unknown Sample	19.7007	-	GAPDH
E9	S I	SYBR GREEN	C57	Unknown Sample	19.9689	-	GAPDH
E10	S I	SYBR GREEN	C58	Unknown Sample	20.2087	-	GAPDH
E11	S I	SYBR GREEN	C59	Unknown Sample	21.7297	-	GAPDH
E12	S I	SYBR GREEN	C60	Unknown Sample	18.4653	-	GAPDH
F1	S I	SYBR GREEN	C61	Unknown Sample	24.8565	-	GAPDH
F2	S I	SYBR GREEN	C62	Unknown Sample	19.8126	-	GAPDH
F3	S I	SYBR GREEN	C63	Unknown Sample	18.1897	-	GAPDH
F4	S I	SYBR GREEN	C64	Unknown Sample	19.8046	-	GAPDH
F5	S I	SYBR GREEN	C65	Unknown Sample	22.0259	-	GAPDH
F6	S I	SYBR GREEN	C66	Unknown Sample	24.4647	-	GAPDH
F7	S I	SYBR GREEN	C67	Unknown Sample	24.1611	-	GAPDH
F8	S I	SYBR GREEN	C68	Unknown Sample	23.3675	-	GAPDH
F9	S I	SYBR GREEN	C69	Unknown Sample	24.9569	-	GAPDH
F10	S I	SYBR GREEN	C70	Unknown Sample	24.2393	-	GAPDH
F11	S I	SYBR GREEN	C71	Unknown Sample	21.8013	-	GAPDH
F12	S I	SYBR GREEN	C72	Unknown Sample	24.6706	-	GAPDH
G1	S I	SYBR GREEN	C73	Unknown Sample	20.339	-	GAPDH
G2	S I	SYBR GREEN	C74	Unknown Sample	21.0315	-	GAPDH
G3	S I	SYBR GREEN	C75	Unknown Sample	20.4708	-	GAPDH
G4	S I	SYBR GREEN	C76	Unknown Sample	21.4246	-	GAPDH
G5	S I	SYBR GREEN	C77	Unknown Sample	18.7815	-	GAPDH
G6	S I	SYBR GREEN	C78	Unknown Sample	18.3672	-	GAPDH
G7	S I	SYBR GREEN	C79	Unknown Sample	18.9259	-	GAPDH
G8	S I	SYBR GREEN	C80	Unknown Sample	19.9771	-	GAPDH
G9	S I	SYBR GREEN	C81	Unknown Sample	24.6395	-	GAPDH
G10	S I	SYBR GREEN	C82	Unknown Sample	20.0566	-	GAPDH
G11	S I	SYBR GREEN	C83	Unknown Sample	21.7128	-	GAPDH
G12	S I	SYBR GREEN	C84	Unknown Sample	22.49	-	GAPDH
H1	S I	SYBR GREEN	C85	Unknown Sample	20.3943	-	GAPDH
H2	S I	SYBR GREEN	C86	Unknown Sample	22.4562	-	GAPDH
H3	S I	SYBR GREEN	C87	Unknown Sample	22.1561	-	GAPDH
H4	S I	SYBR GREEN	C88	Unknown Sample	23.8244	-	GAPDH
H5	S I	SYBR GREEN	C89	Unknown Sample	18.4826	-	GAPDH
H6	S I	SYBR GREEN	C90	Unknown Sample	20.9669	-	GAPDH
H7	S I	SYBR GREEN	C91	Unknown Sample	20.3884	-	GAPDH
H8	S I	SYBR GREEN	C92	Unknown Sample	23.2708	-	GAPDH
H9	S I	SYBR GREEN	C93	Unknown Sample	20.1384	-	GAPDH
H10	S I	SYBR GREEN	C94	Unknown Sample	18.1563	-	GAPDH
H11	S I	SYBR GREEN	C95	Unknown Sample	20.4181	-	GAPDH
H12	S I	SYBR GREEN	C96	Unknown Sample	22.5081	-	GAPDH

[truncated: 5 more sheets: Control no.33-48, Control no.49-64, Control no.65-80, Control no.81-96, Control no.97-99]
